# Supplementary material for: Biochemical and phylogenetic analyses of phosphatidylinositol production in Angomonas deanei, an endosymbiont-harboring trypanosomatid
Source: PubMed Central journal article supplement (PMC4424895; doi:10.1186/s13071-015-0854-x), 2015-04-24
Supplement: 13071_2015_854_MOESM1_ESM.pdf [file 13071_2015_854_MOESM1_ESM.pdf]

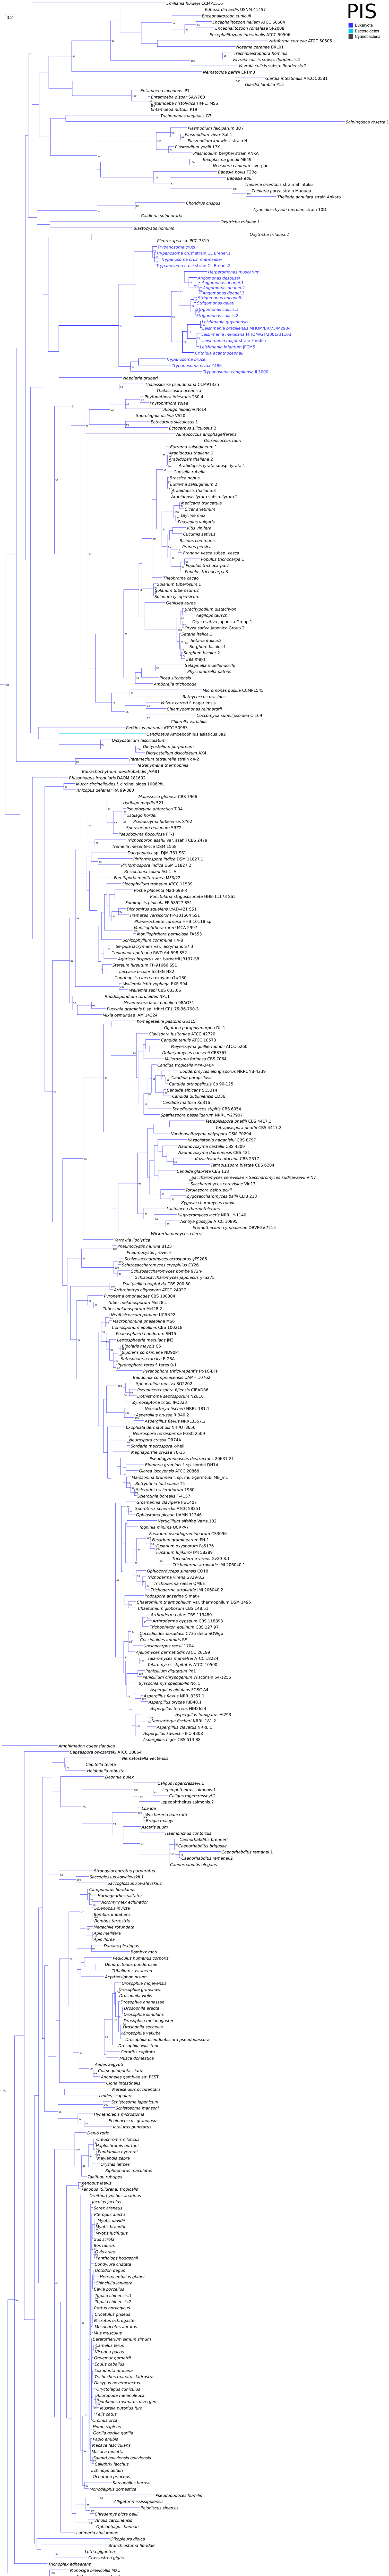

0.2

100
